# Supplementary material for: Delineating the technosphere: definition, categorization, and characteristics
Source: Copernicus journal article supplement (doi:10.5194/esd-16-979-2025), 2025-07-11
Supplement: Supplementary file 1 [file esd-16-979-2025-supplement.pdf]

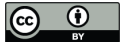

## *Supplement of*

# **Delineating the technosphere: definition, categorization, and characteristics**

**Eric D. Galbraith et al.**

*Correspondence to:* Eric D. Galbraith ([eric.galbraith@mcgill.ca](mailto:eric.galbraith@mcgill.ca))

The copyright of individual parts of the supplement might differ from the article licence.

Table S1. Motivating End-Use Technosphere classification (MEUTEC) category descriptions.

| Level 1                                | Level 2                                                  | Description                                                                                                        | Examples                                                                                                                                  | Priority                                                                                                  |
|----------------------------------------|----------------------------------------------------------|--------------------------------------------------------------------------------------------------------------------|-------------------------------------------------------------------------------------------------------------------------------------------|-----------------------------------------------------------------------------------------------------------|
| Creation & maintenance of technosphere | Material extraction                                      | Machinery, equipment and buildings for the extraction of materials from the biosphere, regosphere and lithosphere. | Chainsaws. Logging machines. Pickaxes. Mine infrastructure (not including for fossil fuels).                                              |                                                                                                           |
|                                        | Material processing                                      | Machinery and facilities to transform raw materials into generally usable forms, prior to manufacture.             | Furnaces, smelters, chemical plants, pulp and paper plants, sawmills, steel foundries.                                                    |                                                                                                           |
|                                        | Creation & maintenance of artifacts                      | Machinery, tools, equipment and factories to aid in the creation and maintenance of artifacts                      | Screwdrivers. Looms. Lathes. Drills. Printing presses. Manufacturing plants. Industrial robots.                                           | Priority over material extraction (e.g. saws). Priority over buildings and maintenance (e.g. hand tools). |
|                                        | Construction & maintenance of buildings & infrastructure | Machinery, tools, equipment and factories to aid in the creation and maintenance of fixed structures.              | Excavators. Bulldozers. Graders. Tampers. Cement mixers. Cranes. Fire trucks. Paving machines. Fire trucks.                               | Priority over material extraction (e.g. diggers)                                                          |
| Energy Provisioning                    | Energy extractors and converters                         | Energy carrier extraction, conversion and storage facilities.                                                      | Oil rigs. Coal mining machinery. Oil refineries. Power plants. Solar panels. Windmills. Nuclear power plants. Hydroelectric power plants. | Priority over material extraction                                                                         |
|                                        | Electricity transmission                                 | Structures and devices to transmit electricity across the Earth surface.                                           | Grid wires. Pylons and poles. Transfer stations. Transformers.                                                                            |                                                                                                           |
| Transportation                         | Surfaces                                                 | Artificial surfaces to facilitate walking and wheeled transport.                                                   | Roads. Railways. Parking lots. Sidewalks.                                                                                                 |                                                                                                           |
|                                        | Storage & logistics                                      | Specialized buildings, infrastructure and containers for loading/unloading and storage of cargo.                   | Warehouses. Forklifts. Shipping terminals. Shipping containers. Cardboard boxes. Non-food packaging.                                      |                                                                                                           |
|                                        | Pipelines                                                | Tubes for transporting fluids over long distances.                                                                 | Oil and gas pipelines. Water pipelines.                                                                                                   |                                                                                                           |
|                                        | Terrestrial Vehicles                                     | Devices for transporting passengers and/or cargo on land.                                                          | Passenger cars and trucks. Buses. Transport trucks. Cargo vans. Motorcycles. Bicycles. Scooters. Saddlery.                                |                                                                                                           |
|                                        | Aquatic vessels                                          | Ships and boats for transporting passengers and/or cargo in marine or freshwater.                                  | Cargo ships. Ferries. Cruise ships. Tankers.                                                                                              |                                                                                                           |
|                                        | Aircraft                                                 | Flying devices for transporting passengers and/or cargo through the atmosphere, including to space.                | Passenger airplanes. Helicopters.                                                                                                         |                                                                                                           |

| Level 1                                          | Level 2                                     | Description                                                                                                                                      | Examples                                                                                                           | Priority                                                                                                   |
|--------------------------------------------------|---------------------------------------------|--------------------------------------------------------------------------------------------------------------------------------------------------|--------------------------------------------------------------------------------------------------------------------|------------------------------------------------------------------------------------------------------------|
| Food provisioning                                | Food growth & collection                    | Machinery, buildings and infrastructure to assist in the growth and collection of food.                                                          | Tractors. Plows. Combine harvesters. Barns. Silos. Fertilizer synthesis facilities. Fishing vessels. Fishing gear. |                                                                                                            |
|                                                  | Food processing & preservation              | Machinery, buildings and packaging for transforming and preserving food.                                                                         | Food packing plants. Refrigerators. Food packaging.                                                                |                                                                                                            |
|                                                  | Food preparation                            | Equipment for final preparation of food immediately prior to consumption, usually carried out at home or in a restaurant.                        | Kitchen knives. Ovens. Pots and pans. Barbecues. Dishwashers. Dishes and tableware.                                |                                                                                                            |
| Somatic maintenance                              | Hygiene and grooming                        | Devices for the regular cleaning, maintenance and decoration of human bodies.                                                                    | Toothbrushes. Razors. Hair dryers and straighteners. Diapers. Toilet paper.                                        |                                                                                                            |
|                                                  | Health care                                 | Devices, buildings and vehicles for addressing the biological functioning of humans and domestic animals.                                        | Stethoscopes. Defibrillators. X-ray machines. Hospitals.                                                           |                                                                                                            |
| Inhabited environment                            | Inhabited environment maintenance           | Devices, machines for maintaining the order and cleanliness of textiles, surfaces and objects in the inhabited environment.                      | Brooms. Vacuum cleaners. Lawn mowers. Laundry machines.                                                            |                                                                                                            |
|                                                  | Waste management                            | Facilities for transforming human excreta and technosphere wastes.                                                                               | Sewage treatment. Incinerators. Recycling machinery.                                                               |                                                                                                            |
| Information, organization and neural interaction | Information storage, processing and display | Artifacts that record and retain information in a persistent form, including those that transform information to generate novel outputs.         | Paper ledgers, calculators, personal computers, smartphones.                                                       | Priority over exchange, deliberate neural restructuring and neural stimulus (e.g. smartphone).             |
|                                                  | Information communications infrastructure   | Persistent infrastructure that transports symbolic information across space, including integrated computational devices (e.g. routers, servers). | Telecommunications networks, including cables, routing stations and controls. Communications satellites.           | Priority over exchange, deliberate neural restructuring and neural stimulus (e.g. internet infrastructure) |
|                                                  | Enforcement                                 | Weapons, buildings and vehicles for the threat or enactment of physical violence against humans and/or technosphere destruction.                 | Guns. Tanks. Fighter jets. Warships. Attack helicopters. Troop transports.                                         |                                                                                                            |
|                                                  | Exchange                                    | Tokens of exchange, facilities for storage and security.                                                                                         | Currency. Stamps. Locks. Vending machines.                                                                         |                                                                                                            |
|                                                  | Deliberate neural restructuring             | Specialized for teaching, research, and religion.                                                                                                | Microscopes. Mass spectrometers. Religious symbols. Monuments.                                                     |                                                                                                            |

| Level 1         | Level 2            | Description                                                                                                              | Examples                                                                                         | Priority                                                           |
|-----------------|--------------------|--------------------------------------------------------------------------------------------------------------------------|--------------------------------------------------------------------------------------------------|--------------------------------------------------------------------|
|                 | Neural stimulus    | Used to produce desired experiences.                                                                                     | Film cameras. Musical instruments. Dice. Toys.                                                   |                                                                    |
|                 | Active recreation  | Items and facilities for recreation with elevated metabolic rates.                                                       | Skis. Soccer balls. Recreation facilities.                                                       |                                                                    |
| Ambient context | Ambient structures | Buildings that provide habitable spaces for human residence and gathering, not functionally specialized.                 | Huts. Houses. Apartment buildings. Palaces. Office buildings.                                    |                                                                    |
|                 | Furnishings        | Movable objects intended to make inhabited environments more comfortable for sitting or sleeping and/or more attractive. | Chairs. Tables. Bedsheets. Blankets. Pillows. Lamps.                                             |                                                                    |
|                 | Apparel            | All clothing items, including for sports, uniforms, footwear, jewellery, and hats.                                       | Shirts. Jackets. Pants. Gloves. Wigs. Necklaces.                                                 |                                                                    |
|                 | Hydraulic control  | Infrastructure for controlling the flow of water, surficial or subterranean, including accumulation in reservoirs.       | Dams. Water supply pipes and sewer systems. Flood control. Water pumping. Canal walls and locks. | Priority over Food growth and collection (e.g. irrigation canals). |

Table S2: MEUTEC applied to the Central Product Classification (CPC) version 2.1 (United Nations, 2015) . Services and component entities were removed.

| code  | CPC category                                                                                                                                                                                                                                                 | Level 1                                | Level 2                                                    |
|-------|--------------------------------------------------------------------------------------------------------------------------------------------------------------------------------------------------------------------------------------------------------------|----------------------------------------|------------------------------------------------------------|
| 44422 | Graders and levellers, self-propelled                                                                                                                                                                                                                        | Creation & maintenance of Technosphere | Construction & maintenance of buildings and infrastructure |
| 44423 | Scrapers, self-propelled                                                                                                                                                                                                                                     | Creation & maintenance of Technosphere | Construction & maintenance of buildings and infrastructure |
| 44424 | Tamping machines and road rollers, self-propelled                                                                                                                                                                                                            | Creation & maintenance of Technosphere | Construction & maintenance of buildings and infrastructure |
| 44425 | Front-end shovel loaders, self-propelled                                                                                                                                                                                                                     | Creation & maintenance of Technosphere | Construction & maintenance of buildings and infrastructure |
| 49115 | Crane lorries                                                                                                                                                                                                                                                | Creation & maintenance of Technosphere | Construction & maintenance of buildings and infrastructure |
| 49531 | Railway or tramway maintenance or service vehicles, whether or not self-propelled                                                                                                                                                                            | Creation & maintenance of Technosphere | Construction & maintenance of buildings and infrastructure |
| 44426 | Mechanical shovels, excavators and shovel loaders, self-propelled, with a 360-degree revolving superstructure, except front-end shovel loaders                                                                                                               | Creation & maintenance of Technosphere | Construction & maintenance of buildings and infrastructure |
| 48212 | Rangefinders, theodolites and tachymeters (tacheometers) and levels                                                                                                                                                                                          | Creation & maintenance of Technosphere | Construction & maintenance of buildings and infrastructure |
| 36950 | Builders' ware of plastics n.e.c.                                                                                                                                                                                                                            | Creation & maintenance of Technosphere | Construction & maintenance of buildings and infrastructure |
| 43923 | Fire extinguishers; spray guns and similar appliances; steam or sand blasting machines and similar jet projecting machines; mechanical appliances for projecting, dispersing or spraying liquids or powders, except agricultural or horticultural appliances | Creation & maintenance of Technosphere | Construction & maintenance of buildings and infrastructure |
| 44221 | Machine-tools for working stone, ceramics, concrete, asbestos-cement or like mineral Materials or for cold working glass                                                                                                                                     | Creation & maintenance of Technosphere | Creation & maintenance of artifacts                        |
| 44222 | Machine-tools for working wood, cork, bone, hard rubber, hard plastics or similar hard Materials; presses for the manufacture of particle board or fibre building board of wood or other ligneous Materials and other machinery for treating wood or cork    | Creation & maintenance of Technosphere | Creation & maintenance of artifacts                        |
| 44915 | Machinery n.e.c. for working rubber or plastics or for the manufacture of products from these Materials                                                                                                                                                      | Creation & maintenance of Technosphere | Creation & maintenance of artifacts                        |
| 48233 | Instruments for measuring length, for use in the hand (including measuring rods and tapes, micrometers and callipers) n.e.c.                                                                                                                                 | Creation & maintenance of Technosphere | Creation & maintenance of artifacts                        |
| 32800 | Composed type, prepared printing plates or cylinders, impressed lithographic stones or other impressed media for use in printing                                                                                                                             | Creation & maintenance of Technosphere | Creation & maintenance of artifacts                        |
| 44211 | Machine-tools for working any Materials by removal of Materials, by laser or other light or photon beam, ultra-sonic, electro-discharge, electro-chemical, electron beam, ionic beam or plasma arc processes, water-jet cutting machines                     | Creation & maintenance of Technosphere | Creation & maintenance of artifacts                        |

| code  | CPC category                                                                                                                                                                                                                                                                                                                                                                                                                          | Level 1                                | Level 2                             |
|-------|---------------------------------------------------------------------------------------------------------------------------------------------------------------------------------------------------------------------------------------------------------------------------------------------------------------------------------------------------------------------------------------------------------------------------------------|----------------------------------------|-------------------------------------|
| 44212 | Machining centres, unit construction machines (single station) and multi-station transfer machines, for working metal                                                                                                                                                                                                                                                                                                                 | Creation & maintenance of Technosphere | Creation & maintenance of artifacts |
| 44213 | Lathes for removing metal                                                                                                                                                                                                                                                                                                                                                                                                             | Creation & maintenance of Technosphere | Creation & maintenance of artifacts |
| 44214 | Machine-tools for drilling, boring or milling metal                                                                                                                                                                                                                                                                                                                                                                                   | Creation & maintenance of Technosphere | Creation & maintenance of artifacts |
| 44215 | Machine-tools for threading or tapping by removing metal, except lathes and way-type unit head machines                                                                                                                                                                                                                                                                                                                               | Creation & maintenance of Technosphere | Creation & maintenance of artifacts |
| 44217 | Machine-tools for working metal by forging, hammering or die-stamping; machine-tools for working metal by bending, folding, straightening, flattening, shearing, punching or notching; other presses for working metal or metal carbides                                                                                                                                                                                              | Creation & maintenance of Technosphere | Creation & maintenance of artifacts |
| 44218 | Machine-tools n.e.c. for working metal, sintered metal carbides or cermets, without removing Materials                                                                                                                                                                                                                                                                                                                                | Creation & maintenance of Technosphere | Creation & maintenance of artifacts |
| 44612 | Weaving machines (looms)                                                                                                                                                                                                                                                                                                                                                                                                              | Creation & maintenance of Technosphere | Creation & maintenance of artifacts |
| 44613 | Knitting machines, stitch-bonding machines, machines for making gimped yarn, tulle, lace, embroidery, trimmings, braid or net and machines for tufting                                                                                                                                                                                                                                                                                | Creation & maintenance of Technosphere | Creation & maintenance of artifacts |
| 44614 | Auxiliary machinery for use with machines for textile extruding, preparing, spinning, weaving, knitting or the like                                                                                                                                                                                                                                                                                                                   | Creation & maintenance of Technosphere | Creation & maintenance of artifacts |
| 44621 | Sewing machines, except book sewing machines and household sewing machines                                                                                                                                                                                                                                                                                                                                                            | Creation & maintenance of Technosphere | Creation & maintenance of artifacts |
| 44629 | Other machinery for textile and apparel production n.e.c.                                                                                                                                                                                                                                                                                                                                                                             | Creation & maintenance of Technosphere | Creation & maintenance of artifacts |
| 44814 | Household sewing machines                                                                                                                                                                                                                                                                                                                                                                                                             | Creation & maintenance of Technosphere | Creation & maintenance of artifacts |
| 44914 | Bookbinding machinery; machinery for type-setting and the like; printing machinery and machines for uses ancillary to printing (except office type sheet-fed offset printing machinery)                                                                                                                                                                                                                                               | Creation & maintenance of Technosphere | Creation & maintenance of artifacts |
| 44918 | Machines and apparatus of a kind used solely or principally for the manufacture of semiconductor boules or wafers, semiconductor devices, electronic integrated circuits or flat panel displays                                                                                                                                                                                                                                       | Creation & maintenance of Technosphere | Creation & maintenance of artifacts |
| 44919 | Special-purpose machinery n.e.c. (including machinery for isotopic separation, machines for assembling electric lamps in glass envelopes, machines for manufacturing glassware and rope making machines)                                                                                                                                                                                                                              | Creation & maintenance of Technosphere | Creation & maintenance of artifacts |
| 53269 | Other constructions for manufacturing                                                                                                                                                                                                                                                                                                                                                                                                 | Creation & maintenance of Technosphere | Creation & maintenance of artifacts |
| 44216 | Machine-tools for deburring, sharpening, grinding, honing, lapping, polishing or otherwise finishing metal, sintered metal carbides or cermets by means of grinding stones, abrasives or polishing products; machine-tools for planing, shaping, slotting, broaching, gear cutting, gear grinding or gear finishing, sawing, cutting-off and other machine-tools working by removing metal, sintered metal carbides or cermets n.e.c. | Creation & maintenance of Technosphere | Creation & maintenance of artifacts |
| 44231 | Tools for working in the hand, pneumatic, hydraulic or with self-contained non-electric motor                                                                                                                                                                                                                                                                                                                                         | Creation & maintenance of Technosphere | Creation & maintenance of artifacts |

| code         | CPC category                                                                                                                                                                                                                                                                                                                                                                              | Level 1                                | Level 2                             |
|--------------|-------------------------------------------------------------------------------------------------------------------------------------------------------------------------------------------------------------------------------------------------------------------------------------------------------------------------------------------------------------------------------------------|----------------------------------------|-------------------------------------|
| <b>44232</b> | Electromechanical tools for working in the hand, with self-contained electric motor                                                                                                                                                                                                                                                                                                       | Creation & maintenance of Technosphere | Creation & maintenance of artifacts |
| <b>44241</b> | Electrical machinery and apparatus for soldering, brazing or welding; electric machines and apparatus for hot spraying of metals or sintered metal carbides                                                                                                                                                                                                                               | Creation & maintenance of Technosphere | Creation & maintenance of artifacts |
| <b>44242</b> | Non-electrical machinery and apparatus for soldering, brazing or welding; gas-operated surface tempering machines and appliances                                                                                                                                                                                                                                                          | Creation & maintenance of Technosphere | Creation & maintenance of artifacts |
| <b>48261</b> | Microscopes (except optical microscopes) and diffraction apparatus                                                                                                                                                                                                                                                                                                                        | Creation & maintenance of Technosphere | Creation & maintenance of artifacts |
| <b>44917</b> | Stand-alone photocopiers, printers and facsimile machines                                                                                                                                                                                                                                                                                                                                 | Creation & maintenance of Technosphere | Creation & maintenance of artifacts |
| <b>44427</b> | Mechanical shovels, excavators and shovel loaders, except front-end shovel loaders and machinery with a 360-degree revolving superstructure; moving, grading, levelling, scraping, excavating, tamping, compacting, extracting or boring machinery n.e.c., self-propelled, for earth, minerals or ores                                                                                    | Creation & maintenance of Technosphere | Material extraction                 |
| <b>44440</b> | Machinery for sorting, screening, separating, washing, crushing, grinding, mixing or kneading earth, stone, ores or other mineral substances, in solid form; machinery for agglomerating, shaping or moulding solid mineral fuels, ceramic paste, unhardened cements, plastering Materials or other mineral products in powder or paste form; machines for forming foundry moulds of sand | Creation & maintenance of Technosphere | Material extraction                 |
| <b>53261</b> | Mining constructions                                                                                                                                                                                                                                                                                                                                                                      | Creation & maintenance of Technosphere | Material extraction                 |
| <b>43932</b> | Machinery n.e.c. for the treatment of Materials by a process involving a change of temperature                                                                                                                                                                                                                                                                                            | Creation & maintenance of Technosphere | Material processing                 |
| <b>43933</b> | Calendering or other rolling machines, except for metals or glass                                                                                                                                                                                                                                                                                                                         | Creation & maintenance of Technosphere | Material processing                 |
| <b>44310</b> | Converters, ladles, ingot moulds and casting machines, of a kind used in metallurgy or in metal foundries; metal-rolling mills                                                                                                                                                                                                                                                            | Creation & maintenance of Technosphere | Material processing                 |
| <b>44517</b> | Machinery n.e.c. for processing tobacco                                                                                                                                                                                                                                                                                                                                                   | Creation & maintenance of Technosphere | Material processing                 |
| <b>44611</b> | Machines for extruding, drawing, texturing or cutting man-made textile Materials; machines for preparing textile fibres or producing textile yarns; textile reeling or winding machines and machines for preparing textile yarns for use on machines for weaving, knitting and the like                                                                                                   | Creation & maintenance of Technosphere | Material processing                 |
| <b>44912</b> | Dryers for wood, paper pulp, paper or paperboard and for other Materials except agriculture products                                                                                                                                                                                                                                                                                      | Creation & maintenance of Technosphere | Material processing                 |
| <b>44913</b> | Machinery for making pulp of fibrous cellulosic Materials or for making or finishing paper or paperboard; machinery (except bookbinding machinery) for making up paper pulp, paper or paperboard                                                                                                                                                                                          | Creation & maintenance of Technosphere | Material processing                 |
| <b>44916</b> | Moulding boxes for metal foundry; mould bases; moulding patterns; moulds for metal (except ingot moulds), metal carbides, glass, mineral Materials, rubber or plastics                                                                                                                                                                                                                    | Creation & maintenance of Technosphere | Material processing                 |

| code  | CPC category                                                                                                                                                                                      | Level 1                                | Level 2                          |
|-------|---------------------------------------------------------------------------------------------------------------------------------------------------------------------------------------------------|----------------------------------------|----------------------------------|
| 43911 | Producer gas or water gas generators; acetylene gas generators and similar water process gas generators; distilling or rectifying plant; heat exchange units; machinery for liquefying air or gas | Creation & maintenance of Technosphere | Material processing              |
| 53242 | Long-distance communication and power lines (cables)                                                                                                                                              | Energy                                 | Electricity transmission         |
| 46121 | Electrical transformers                                                                                                                                                                           | Energy                                 | Electricity transmission         |
| 44412 | Coal or rock cutters and tunnelling machinery; other boring and sinking machinery                                                                                                                 | Energy                                 | Energy extraction and converters |
| 38998 | Matches                                                                                                                                                                                           | Energy                                 | Energy extraction and converters |
| 42310 | Nuclear reactors                                                                                                                                                                                  | Energy                                 | Energy extraction and converters |
| 42320 | Steam or other vapour generating boilers (other than central heating hot water boilers capable also of producing low pressure steam); super-heated water boilers                                  | Energy                                 | Energy extraction and converters |
| 42330 | Auxiliary plant for use with boilers; condensers for steam or other vapour power units                                                                                                            | Energy                                 | Energy extraction and converters |
| 46410 | Primary cells and primary batteries                                                                                                                                                               | Energy                                 | Energy extraction and converters |
| 46420 | Electric accumulators                                                                                                                                                                             | Energy                                 | Energy extraction and converters |
| 53262 | Power plants                                                                                                                                                                                      | Energy                                 | Energy extraction and converters |
| 41282 | Casing, tubing and drill pipe, of a kind used in the drilling for oil or gas, seamless, of steel                                                                                                  | Energy                                 | Energy extraction and converters |
| 41286 | Casing and tubing, of a kind used in the drilling for oil or gas, welded, of steel                                                                                                                | Energy                                 | Energy extraction and converters |
| 49320 | Floating or submersible drilling or production platforms                                                                                                                                          | Energy                                 | Energy extraction and converters |
| 27170 | Parachutes                                                                                                                                                                                        | Transportation                         | Aircraft                         |
| 49610 | Balloons and dirigibles; gliders, hang gliders and other non-powered aircraft                                                                                                                     | Transportation                         | Aircraft                         |
| 49621 | Helicopters                                                                                                                                                                                       | Transportation                         | Aircraft                         |
| 49622 | Aeroplanes and other powered aircraft of an unladen weight not exceeding 2000 kg                                                                                                                  | Transportation                         | Aircraft                         |
| 49623 | Aeroplanes and other powered aircraft of an unladen weight exceeding 2000 kg                                                                                                                      | Transportation                         | Aircraft                         |
| 49630 | Spacecraft and spacecraft launch vehicles                                                                                                                                                         | Transportation                         | Aircraft                         |
| 42998 | Ships' propellers and blades therefor                                                                                                                                                             | Transportation                         | Aquatic Vessels                  |
| 49311 | Cruise ships, excursion boats and similar vessels, principally designed for the transport of persons; ferry boats of all kinds                                                                    | Transportation                         | Aquatic Vessels                  |
| 49312 | Tankers (ships)                                                                                                                                                                                   | Transportation                         | Aquatic Vessels                  |
| 49313 | Refrigerator vessels (ships), except tankers                                                                                                                                                      | Transportation                         | Aquatic Vessels                  |

| code  | CPC category                                                                                                                                                                                                                                                             | Level 1        | Level 2             |
|-------|--------------------------------------------------------------------------------------------------------------------------------------------------------------------------------------------------------------------------------------------------------------------------|----------------|---------------------|
| 49314 | Other vessels for the transport of goods and other vessels for the transport of both persons and goods                                                                                                                                                                   | Transportation | Aquatic Vessels     |
| 49316 | Tugs and pusher craft                                                                                                                                                                                                                                                    | Transportation | Aquatic Vessels     |
| 49319 | Other vessels (including light-vessels, fire-floats, dredgers, floating cranes, floating docks, warships and lifeboats other than rowing boats), except floating or submersible drilling or production platforms                                                         | Transportation | Aquatic Vessels     |
| 49410 | Sailboats (except inflatable), with or without auxiliary motor                                                                                                                                                                                                           | Transportation | Aquatic Vessels     |
| 49490 | Other vessels for pleasure or sports; rowing boats and canoes                                                                                                                                                                                                            | Transportation | Aquatic Vessels     |
| 53241 | Long-distance pipelines                                                                                                                                                                                                                                                  | Transportation | Pipelines           |
| 53251 | Local pipelines                                                                                                                                                                                                                                                          | Transportation | Pipelines           |
| 31923 | Manufactures of straw, of esparto or of other plaiting Materials; basketware and wickerwork                                                                                                                                                                              | Transportation | Storage & logistics |
| 48211 | Direction finding compasses; other navigational instruments and appliances                                                                                                                                                                                               | Transportation | Storage & logistics |
| 29220 | Luggage, handbags and the like, of leather, composition leather, plastic sheeting, textile Materials, vulcanized fibre or paperboard; travel sets for personal toilet, sewing or shoe or clothes cleaning                                                                | Transportation | Storage & logistics |
| 53232 | Harbours, waterways and related facilities                                                                                                                                                                                                                               | Transportation | Storage & logistics |
| 31700 | Packing cases, boxes, crates, drums and similar packings, of wood; cable-drums of wood; pallets, box pallets and other load boards, of wood; casks, barrels, vats, tubs and other coopers' products and parts thereof, of wood (including staves)                        | Transportation | Storage & logistics |
| 36410 | Sacks and bags, of plastics                                                                                                                                                                                                                                              | Transportation | Storage & logistics |
| 36490 | Other articles for the conveyance or packing of goods, of plastics; stoppers, lids, caps and other closures, of plastics                                                                                                                                                 | Transportation | Storage & logistics |
| 37191 | Bottles, jars, phials and other containers, of glass, of a kind used for the conveyance or packing of goods, except ampoules; stoppers, lids and other closures, of glass                                                                                                | Transportation | Storage & logistics |
| 27150 | Sacks and bags, of a kind used for the packing of goods                                                                                                                                                                                                                  | Transportation | Storage & logistics |
| 27310 | Twine, cordage, rope and cables                                                                                                                                                                                                                                          | Transportation | Storage & logistics |
| 32153 | Cartons, boxes, cases, record sleeves and other packing containers (except bags) of paper, paperboard, cellulose wadding or webs of cellulose fibres; box files, letter trays, and similar articles, of paper or paperboard of a kind used in offices, shops or the like | Transportation | Storage & logistics |
| 42210 | Reservoirs, tanks, vats and similar containers (other than for compressed or liquefied gas), of iron, steel or aluminium, of a capacity exceeding 300 litres, not fitted with mechanical or thermal equipment                                                            | Transportation | Storage & logistics |
| 42220 | Containers for compressed or liquefied gas, of iron, steel or aluminium                                                                                                                                                                                                  | Transportation | Storage & logistics |

| code  | CPC category                                                                                                                                                                                                              | Level 1        | Level 2             |
|-------|---------------------------------------------------------------------------------------------------------------------------------------------------------------------------------------------------------------------------|----------------|---------------------|
| 42931 | Tanks, casks, drums, cans, boxes and similar containers (other than for compressed or liquefied gas) of iron, steel or aluminium, of a capacity not exceeding 300 litres, not fitted with mechanical or thermal equipment | Transportation | Storage & logistics |
| 42932 | Stoppers, caps and lids (including crown corks), capsules for bottles, threaded bungs, bung covers, seals and other packing accessories, of base metal                                                                    | Transportation | Storage & logistics |
| 43510 | Pulley tackle and hoists other than skip hoists; winches and capstans; jacks                                                                                                                                              | Transportation | Storage & logistics |
| 43520 | Derricks; cranes; mobile lifting frames, straddle carriers and works trucks fitted with a crane                                                                                                                           | Transportation | Storage & logistics |
| 43530 | Fork-lift trucks; other works trucks whether or not fitted with lifting or handling equipment; tractors of the type used on railway station platforms                                                                     | Transportation | Storage & logistics |
| 43540 | Lifts, skip hoists, escalators and moving walkways                                                                                                                                                                        | Transportation | Storage & logistics |
| 43550 | Pneumatic and other continuous action elevators and conveyors, for goods or Materials                                                                                                                                     | Transportation | Storage & logistics |
| 43560 | Other lifting, handling, loading or unloading machinery                                                                                                                                                                   | Transportation | Storage & logistics |
| 49221 | Containers specially designed and equipped for carriage by one or more modes of transport                                                                                                                                 | Transportation | Storage & logistics |
| 53211 | Highways (except elevated highways), streets and roads                                                                                                                                                                    | Transportation | Surfaces            |
| 53212 | Railways                                                                                                                                                                                                                  | Transportation | Surfaces            |
| 53213 | Airfield runways                                                                                                                                                                                                          | Transportation | Surfaces            |
| 53221 | Bridges and elevated highways                                                                                                                                                                                             | Transportation | Surfaces            |
| 53222 | Tunnels                                                                                                                                                                                                                   | Transportation | Surfaces            |
| 42110 | Bridges, bridge sections, towers and lattice masts, of iron or steel                                                                                                                                                      | Transportation | Surfaces            |
| 38992 | Baby carriages and parts thereof                                                                                                                                                                                          | Transportation | Vehicles            |
| 29210 | Saddlery and harness, for any animal, of any Materials                                                                                                                                                                    | Transportation | Vehicles            |
| 49111 | Road tractors for semi-trailers                                                                                                                                                                                           | Transportation | Vehicles            |
| 49112 | Public-transport type passenger motor vehicles                                                                                                                                                                            | Transportation | Vehicles            |
| 49113 | Motor cars and other motor vehicles principally designed for the transport of persons (except public-transport type vehicles, vehicles specially designed for travelling on snow, and golf cars and similar vehicles)     | Transportation | Vehicles            |
| 49114 | Motor vehicles n.e.c. for the transport of goods                                                                                                                                                                          | Transportation | Vehicles            |
| 49116 | Motor vehicles, for the transport of persons, specially designed for travelling on snow; golf cars and similar vehicles                                                                                                   | Transportation | Vehicles            |
| 49119 | Special-purpose motor vehicles n.e.c.                                                                                                                                                                                     | Transportation | Vehicles            |

| code  | CPC category                                                                                                                                                                                                  | Level 1           | Level 2                  |
|-------|---------------------------------------------------------------------------------------------------------------------------------------------------------------------------------------------------------------|-------------------|--------------------------|
| 49229 | Other trailers and semi-trailers (including trailers and semi-trailers for the transport of goods), except self-loading or self-unloading trailers or semi-trailers for agricultural purposes                 | Transportation    | Vehicles                 |
| 49511 | Rail locomotives powered from an external source of electricity                                                                                                                                               | Transportation    | Vehicles                 |
| 49512 | Diesel-electric locomotives                                                                                                                                                                                   | Transportation    | Vehicles                 |
| 49519 | Other rail locomotives; locomotive tenders                                                                                                                                                                    | Transportation    | Vehicles                 |
| 49520 | Self-propelled railway or tramway coaches, vans and trucks (except maintenance or service vehicles)                                                                                                           | Transportation    | Vehicles                 |
| 49532 | Railway or tramway passenger coaches, not self-propelled; luggage vans, post office coaches and other special-purpose railway or tramway coaches, not self-propelled (except maintenance or service vehicles) | Transportation    | Vehicles                 |
| 49533 | Railway or tramway goods vans and wagons, not self-propelled                                                                                                                                                  | Transportation    | Vehicles                 |
| 49911 | Motorcycles and cycles fitted with an auxiliary motor, with reciprocating internal combustion piston engine of a cylinder capacity not exceeding 50 cc                                                        | Transportation    | Vehicles                 |
| 49912 | Motorcycles and cycles fitted with an auxiliary motor, with reciprocating internal combustion piston engine of a cylinder capacity exceeding 50 cc                                                            | Transportation    | Vehicles                 |
| 49913 | Motorcycles and cycles fitted with an auxiliary motor, other than those with reciprocating internal combustion piston engines; side-cars                                                                      | Transportation    | Vehicles                 |
| 49921 | Bicycles and other cycles, not motorized                                                                                                                                                                      | Transportation    | Vehicles                 |
| 49922 | Invalid carriages                                                                                                                                                                                             | Transportation    | Vehicles                 |
| 49930 | Vehicles n.e.c., not mechanically propelled                                                                                                                                                                   | Transportation    | Vehicles                 |
| 44111 | Ploughs                                                                                                                                                                                                       | Food provisioning | Food growth & collection |
| 44112 | Harrows, scarifiers, cultivators, weeders and hoes                                                                                                                                                            | Food provisioning | Food growth & collection |
| 44113 | Seeders, planters and transplanters                                                                                                                                                                           | Food provisioning | Food growth & collection |
| 44114 | Manure spreaders and fertilizer distributors                                                                                                                                                                  | Food provisioning | Food growth & collection |
| 44119 | Other soil machinery, n.e.c.                                                                                                                                                                                  | Food provisioning | Food growth & collection |
| 44122 | Combine harvester / threshers                                                                                                                                                                                 | Food provisioning | Food growth & collection |
| 44123 | Other mowers, including cutter bars for tractor mounting                                                                                                                                                      | Food provisioning | Food growth & collection |
| 44124 | Other haymaking machinery                                                                                                                                                                                     | Food provisioning | Food growth & collection |
| 44125 | Straw or fodder balers, including pickup balers                                                                                                                                                               | Food provisioning | Food growth & collection |
| 44126 | Root or tuber harvesting machines                                                                                                                                                                             | Food provisioning | Food growth & collection |
| 44127 | Machines for cleaning, sorting or grading eggs, fruits or other agricultural produce                                                                                                                          | Food provisioning | Food growth & collection |
| 44129 | Other harvesting and threshing machinery, n.e.c.; parts for harvesting, threshing and grading machinery                                                                                                       | Food provisioning | Food growth & collection |

| code  | CPC category                                                                                                                                                                                                                                                                                                                                                                                                                                               | Level 1           | Level 2                        |
|-------|------------------------------------------------------------------------------------------------------------------------------------------------------------------------------------------------------------------------------------------------------------------------------------------------------------------------------------------------------------------------------------------------------------------------------------------------------------|-------------------|--------------------------------|
| 44131 | Milking machines                                                                                                                                                                                                                                                                                                                                                                                                                                           | Food provisioning | Food growth & collection       |
| 44141 | Pedestrian controlled tractors                                                                                                                                                                                                                                                                                                                                                                                                                             | Food provisioning | Food growth & collection       |
| 44142 | Track-laying tractors                                                                                                                                                                                                                                                                                                                                                                                                                                      | Food provisioning | Food growth & collection       |
| 44149 | Other agricultural tractors                                                                                                                                                                                                                                                                                                                                                                                                                                | Food provisioning | Food growth & collection       |
| 44150 | Mechanical appliances for projecting, dispersing or spraying liquids or powders for agriculture or horticulture                                                                                                                                                                                                                                                                                                                                            | Food provisioning | Food growth & collection       |
| 44160 | Self-loading or self-unloading trailers and semi-trailers for agricultural purposes                                                                                                                                                                                                                                                                                                                                                                        | Food provisioning | Food growth & collection       |
| 44192 | Machinery for preparing animal feeding stuffs                                                                                                                                                                                                                                                                                                                                                                                                              | Food provisioning | Food growth & collection       |
| 44193 | Poultry incubators and brooders                                                                                                                                                                                                                                                                                                                                                                                                                            | Food provisioning | Food growth & collection       |
| 44194 | Poultry-keeping machinery                                                                                                                                                                                                                                                                                                                                                                                                                                  | Food provisioning | Food growth & collection       |
| 44198 | Other agricultural machinery n.e.c.                                                                                                                                                                                                                                                                                                                                                                                                                        | Food provisioning | Food growth & collection       |
| 38450 | Fishing rods and other line fishing tackle; fish landing nets, butterfly nets and similar nets; decoy "birds" and similar hunting or shooting requisites                                                                                                                                                                                                                                                                                                   | Food provisioning | Food growth & collection       |
| 49315 | Fishing vessels; factory ships and other vessels for processing or preserving fishery products                                                                                                                                                                                                                                                                                                                                                             | Food provisioning | Food growth & collection       |
| 31912 | Tableware and kitchenware, of wood                                                                                                                                                                                                                                                                                                                                                                                                                         | Food provisioning | Food preparation               |
| 36940 | Tableware, kitchenware, other household articles and toilet articles, of plastics                                                                                                                                                                                                                                                                                                                                                                          | Food provisioning | Food preparation               |
| 42912 | Table, kitchen or other household articles and parts thereof, of iron, steel, copper or aluminium; cooking or heating apparatus of a kind used for domestic purposes, non-electric, of copper; pot scourers and scouring or polishing pads, gloves and the like, of iron or steel, copper or aluminium; iron or steel wool; hand-operated mechanical appliances, weighing 10 kg or less, used in the preparation, conditioning or serving of food or drink | Food provisioning | Food preparation               |
| 42913 | Knives (except for machines) and scissors, and blades therefor                                                                                                                                                                                                                                                                                                                                                                                             | Food provisioning | Food preparation               |
| 42916 | Spoons, forks, ladles, skimmers, cake-servers, fish-knives, butter-knives, sugar tongs and similar kitchen or table ware                                                                                                                                                                                                                                                                                                                                   | Food provisioning | Food preparation               |
| 43935 | Dishwashing machines, except household type                                                                                                                                                                                                                                                                                                                                                                                                                | Food provisioning | Food preparation               |
| 44515 | Bakery ovens, non-electric; machinery for making hot drinks or for cooking or heating food, except domestic type machines                                                                                                                                                                                                                                                                                                                                  | Food provisioning | Food preparation               |
| 44821 | Cooking appliances and plate warmers, non-electric, domestic, of iron or steel                                                                                                                                                                                                                                                                                                                                                                             | Food provisioning | Food preparation               |
| 44128 | Machines for cleaning, sorting or grading seed, grain or dried leguminous vegetables                                                                                                                                                                                                                                                                                                                                                                       | Food provisioning | Food processing & preservation |
| 44132 | Dairy machinery                                                                                                                                                                                                                                                                                                                                                                                                                                            | Food provisioning | Food processing & preservation |
| 44811 | Refrigerators and freezers, household type, electric or non-electric                                                                                                                                                                                                                                                                                                                                                                                       | Food provisioning | Food processing & preservation |

| code         | CPC category                                                                                                                                                                                                                                        | Level 1               | Level 2                        |
|--------------|-----------------------------------------------------------------------------------------------------------------------------------------------------------------------------------------------------------------------------------------------------|-----------------------|--------------------------------|
| <b>44191</b> | Presses, crushers and similar machinery used in the manufacture of wine, cider, fruit juices or similar beverages                                                                                                                                   | Food provisioning     | Food processing & preservation |
| <b>44513</b> | Machinery used in the milling industry or for the working of cereals or dried leguminous vegetables other than farm-type machinery                                                                                                                  | Food provisioning     | Food processing & preservation |
| <b>44516</b> | Machinery n.e.c. for the industrial preparation or manufacture of food or drink (including fats or oils)                                                                                                                                            | Food provisioning     | Food processing & preservation |
| <b>44518</b> | Dryers for agricultural products                                                                                                                                                                                                                    | Food provisioning     | Food processing & preservation |
| <b>43921</b> | Machinery for cleaning or drying bottles or other containers; machinery for filling, closing, sealing, capsuling or labelling bottles, cans, boxes, bags or other containers; machinery for aerating beverages; other packing or wrapping machinery | Food provisioning     | Food processing & preservation |
| <b>28221</b> | Men's or boys' suits, coats, jackets, trousers, shorts and the like, knitted or crocheted                                                                                                                                                           | Inhabited environment | Apparel                        |
| <b>28222</b> | Men's or boys' shirts, underpants, pyjamas, dressing gowns and similar articles, knitted or crocheted                                                                                                                                               | Inhabited environment | Apparel                        |
| <b>28223</b> | Women's or girls' suits, coats, jackets, dresses, skirts, trousers, shorts and the like, knitted or crocheted                                                                                                                                       | Inhabited environment | Apparel                        |
| <b>28224</b> | Women's or girls' blouses, shirts, petticoats, panties, nightdresses, dressing gowns and similar articles, knitted or crocheted                                                                                                                     | Inhabited environment | Apparel                        |
| <b>28225</b> | T-shirts, singlets and other vests, knitted or crocheted                                                                                                                                                                                            | Inhabited environment | Apparel                        |
| <b>28226</b> | Jerseys, pullovers, cardigans, waistcoats and similar articles, knitted or crocheted                                                                                                                                                                | Inhabited environment | Apparel                        |
| <b>28227</b> | Babies' garments and clothing accessories, knitted or crocheted                                                                                                                                                                                     | Inhabited environment | Apparel                        |
| <b>28228</b> | Track suits, ski suits, swimwear and other garments, knitted or crocheted n.e.c.                                                                                                                                                                    | Inhabited environment | Apparel                        |
| <b>28229</b> | Gloves, shawls, scarves, veils, ties, cravats and other made-up clothing accessories, knitted or crocheted; knitted or crocheted parts of garments or of clothing accessories                                                                       | Inhabited environment | Apparel                        |
| <b>28231</b> | Men's or boys' suits, coats, jackets, trousers, shorts and the like, of textile fabric, not knitted or crocheted                                                                                                                                    | Inhabited environment | Apparel                        |
| <b>28232</b> | Men's or boys' shirts, singlets, underpants, pyjamas, dressing gowns and similar articles, of textile fabric, not knitted or crocheted                                                                                                              | Inhabited environment | Apparel                        |
| <b>28233</b> | Women's or girls' suits, coats, jackets, dresses, skirts, trousers, shorts and the like, of textile fabric, not knitted or crocheted                                                                                                                | Inhabited environment | Apparel                        |
| <b>28234</b> | Women's or girls' blouses, shirts, singlets, petticoats, panties, nightdresses, dressing gowns and similar articles, of textile fabric, not knitted or crocheted                                                                                    | Inhabited environment | Apparel                        |
| <b>28235</b> | Babies' garments and clothing accessories, of textile fabric, not knitted or crocheted                                                                                                                                                              | Inhabited environment | Apparel                        |
| <b>28236</b> | Track suits, ski suits, swimwear and other garments, of textile fabric, not knitted or crocheted n.e.c.                                                                                                                                             | Inhabited environment | Apparel                        |

| code         | CPC category                                                                                                                                                                                                                                       | Level 1               | Level 2 |
|--------------|----------------------------------------------------------------------------------------------------------------------------------------------------------------------------------------------------------------------------------------------------|-----------------------|---------|
| <b>28237</b> | Brassieres, girdles, corsets, braces, suspenders, garters and similar articles and parts thereof, whether or not knitted or crocheted                                                                                                              | Inhabited environment | Apparel |
| <b>28238</b> | Handkerchiefs, shawls, scarves, veils, ties, cravats, gloves and other made-up clothing accessories, of textile fabric, not knitted or crocheted; parts of garments or of clothing accessories, of textile fabric, not knitted or crocheted n.e.c. | Inhabited environment | Apparel |
| <b>28241</b> | Apparel of leather or of composition leather                                                                                                                                                                                                       | Inhabited environment | Apparel |
| <b>28242</b> | Clothing accessories of leather or of composition leather, except sports gloves                                                                                                                                                                    | Inhabited environment | Apparel |
| <b>28243</b> | Apparel and clothing accessories of plastics (incl. gloves)                                                                                                                                                                                        | Inhabited environment | Apparel |
| <b>28250</b> | Garments made up of felt or nonwovens; garments made up of textile fabrics impregnated or coated with plastics, rubber or other Materials                                                                                                          | Inhabited environment | Apparel |
| <b>28261</b> | Hat-forms, hat bodies and hoods of felt; plateaux and manchons of felt; hat-shapes, plaited or made by assembling strips of any Materials                                                                                                          | Inhabited environment | Apparel |
| <b>28262</b> | Hats and other headgear, of felt, or plaited or made by assembling strips of any Materials, or knitted or crocheted or made up from lace or other textile fabric in the piece; hair-nets                                                           | Inhabited environment | Apparel |
| <b>28269</b> | Other headgear except headgear of rubber or of plastics, safety headgear and asbestos headgear; head-bands, linings, covers, hat foundations, hat frames, peaks and chinstraps, for headgear                                                       | Inhabited environment | Apparel |
| <b>28320</b> | Articles of apparel, clothing accessories and other articles of furskin (except headgear)                                                                                                                                                          | Inhabited environment | Apparel |
| <b>28330</b> | Artificial fur and articles thereof (except headgear)                                                                                                                                                                                              | Inhabited environment | Apparel |
| <b>29310</b> | Waterproof footwear, with outer soles and uppers of rubber or plastics, other than footwear incorporating a protective metal toe-cap                                                                                                               | Inhabited environment | Apparel |
| <b>29320</b> | Footwear with outer soles and uppers of rubber or plastics, other than waterproof footwear or sports footwear                                                                                                                                      | Inhabited environment | Apparel |
| <b>29330</b> | Footwear with uppers of leather, other than sports footwear, footwear incorporating a protective metal toe-cap and miscellaneous special footwear                                                                                                  | Inhabited environment | Apparel |
| <b>29340</b> | Footwear with uppers of textile Materials, other than sports footwear                                                                                                                                                                              | Inhabited environment | Apparel |
| <b>29410</b> | Ski-boots, snowboard boots and cross-country ski footwear                                                                                                                                                                                          | Inhabited environment | Apparel |
| <b>29420</b> | Tennis shoes, basketball shoes, gym shoes, training shoes and the like                                                                                                                                                                             | Inhabited environment | Apparel |
| <b>29490</b> | Other sports footwear, except skating boots                                                                                                                                                                                                        | Inhabited environment | Apparel |
| <b>29510</b> | Footwear incorporating a protective metal toe-cap, except those covered in subclass 29320                                                                                                                                                          | Inhabited environment | Apparel |
| <b>29520</b> | Wooden footwear, miscellaneous special footwear and other footwear n.e.c.                                                                                                                                                                          | Inhabited environment | Apparel |

| code         | CPC category                                                                                                                                                                                                                                                                                                     | Level 1               | Level 2    |
|--------------|------------------------------------------------------------------------------------------------------------------------------------------------------------------------------------------------------------------------------------------------------------------------------------------------------------------|-----------------------|------------|
| <b>29600</b> | Parts of footwear; removable insoles, heel cushions and similar articles; gaiters, leggings and similar articles, and parts thereof                                                                                                                                                                              | Inhabited environment | Apparel    |
| <b>36260</b> | Articles of apparel and clothing accessories (including gloves) of vulcanized rubber other than hard rubber                                                                                                                                                                                                      | Inhabited environment | Apparel    |
| <b>38240</b> | Jewellery and other articles of precious metal or of metal clad with precious metal; articles of natural or cultured pearls or precious or semi-precious stones (natural, synthetic or reconstructed)                                                                                                            | Inhabited environment | Apparel    |
| <b>38972</b> | Human hair, dressed, thinned, bleached or otherwise worked; wool or other animal hair or other textile Materials, prepared for use in making wigs or the like; wigs, false beards, eyebrows and eyelashes, switches and the like, of human or animal hair or of textile Materials; articles of human hair n.e.c. | Inhabited environment | Apparel    |
| <b>38997</b> | Imitation jewellery                                                                                                                                                                                                                                                                                              | Inhabited environment | Apparel    |
| <b>48312</b> | Spectacles, goggles and the like, corrective, protective or other                                                                                                                                                                                                                                                | Inhabited environment | Apparel    |
| <b>48313</b> | Frames and mountings for spectacles, goggles or the like                                                                                                                                                                                                                                                         | Inhabited environment | Apparel    |
| <b>36971</b> | Safety headgear                                                                                                                                                                                                                                                                                                  | Inhabited environment | Apparel    |
| <b>36972</b> | Other headgear of rubber or plastics                                                                                                                                                                                                                                                                             | Inhabited environment | Apparel    |
| <b>28210</b> | Panty hose, tights, stockings, socks and other hosiery, knitted or crocheted                                                                                                                                                                                                                                     | Inhabited environment | Apparel    |
| <b>43912</b> | Air-conditioning machines                                                                                                                                                                                                                                                                                        | Inhabited environment | Furnishing |
| <b>44815</b> | Fans and ventilating or recycling hoods of the domestic type                                                                                                                                                                                                                                                     | Inhabited environment | Furnishing |
| <b>44822</b> | Stoves, grates, braziers and similar non-electric domestic appliances (other than cooking appliances and plate warmers) of iron or steel                                                                                                                                                                         | Inhabited environment | Furnishing |
| <b>46539</b> | Other electric lamps and lighting fittings (including lamps and lighting fittings of a kind used for lighting public open spaces or thorough-fares)                                                                                                                                                              | Inhabited environment | Furnishing |
| <b>31914</b> | Wooden frames for paintings, photographs, mirrors or similar objects, and other articles of wood                                                                                                                                                                                                                 | Inhabited environment | Furnishing |
| <b>44813</b> | Electric blankets                                                                                                                                                                                                                                                                                                | Inhabited environment | Furnishing |
| <b>32195</b> | Textile wall coverings                                                                                                                                                                                                                                                                                           | Inhabited environment | Furnishing |
| <b>37222</b> | Statuettes and other ornamental ceramic articles                                                                                                                                                                                                                                                                 | Inhabited environment | Furnishing |
| <b>38111</b> | Seats, primarily with metal frames                                                                                                                                                                                                                                                                               | Inhabited environment | Furnishing |
| <b>38112</b> | Seats, primarily with wooden frames                                                                                                                                                                                                                                                                              | Inhabited environment | Furnishing |
| <b>38119</b> | Other seats                                                                                                                                                                                                                                                                                                      | Inhabited environment | Furnishing |
| <b>38121</b> | Other metal furniture, of a kind used in offices                                                                                                                                                                                                                                                                 | Inhabited environment | Furnishing |
| <b>38122</b> | Other wooden furniture, of a kind used in offices                                                                                                                                                                                                                                                                | Inhabited environment | Furnishing |
| <b>38130</b> | Other wooden furniture, of a kind used in the kitchen                                                                                                                                                                                                                                                            | Inhabited environment | Furnishing |
| <b>38140</b> | Other furniture n.e.c.                                                                                                                                                                                                                                                                                           | Inhabited environment | Furnishing |

| code  | CPC category                                                                                                                                                                                                            | Level 1               | Level 2                           |
|-------|-------------------------------------------------------------------------------------------------------------------------------------------------------------------------------------------------------------------------|-----------------------|-----------------------------------|
| 38150 | Mattress supports; mattresses, fitted with springs or stuffed or internally fitted with any Materials or of cellular rubber or plastics, whether or not covered                                                         | Inhabited environment | Furnishing                        |
| 38961 | Paintings, drawings and pastels; original engravings, prints and lithographs; original sculptures and statuary, in any Materials                                                                                        | Inhabited environment | Furnishing                        |
| 42996 | Statuettes and other ornaments of base metal; photograph, picture or similar frames of base metal; mirrors of base metal                                                                                                | Inhabited environment | Furnishing                        |
| 46532 | Lighting sets of a kind used for Christmas trees                                                                                                                                                                        | Inhabited environment | Furnishing                        |
| 27110 | Blankets and travelling rugs (except electric blankets)                                                                                                                                                                 | Inhabited environment | Furnishing                        |
| 27120 | Bed linen, table linen, toilet linen and kitchen linen                                                                                                                                                                  | Inhabited environment | Furnishing                        |
| 27130 | Curtains (including drapes) and interior blinds; curtain or bed valances                                                                                                                                                | Inhabited environment | Furnishing                        |
| 27140 | Other furnishing articles n.e.c.; sets of woven fabric and yarn for making up into rugs, tapestries, embroidered table cloths or serviettes, or similar textile articles, put up in packings for retail sale            | Inhabited environment | Furnishing                        |
| 27180 | Quilts, eiderdowns, cushions, pouffes, pillows, sleeping bags and the like, fitted with springs or stuffed or internally fitted with any Materials or of cellular rubber or plastics                                    | Inhabited environment | Furnishing                        |
| 43931 | Fans, except domestic type; centrifuges, except cream separators and clothes dryers                                                                                                                                     | Inhabited environment | Furnishing                        |
| 42994 | Paper trays, paper rests, pen trays, office-stamp stands and similar office or desk equipment, of base metal, other than office furniture                                                                               | Inhabited environment | Furnishing                        |
| 53234 | Irrigation and flood control waterworks                                                                                                                                                                                 | Inhabited environment | Hydraulic control                 |
| 53233 | Dams                                                                                                                                                                                                                    | Inhabited environment | Hydraulic control                 |
| 53231 | Aqueducts and other water supply conduits, except pipelines                                                                                                                                                             | Inhabited environment | Hydraulic control                 |
| 38993 | Brooms, brushes, hand-operated mechanical floor sweepers (not motorized), mops and feather dusters; prepared knots and tufts for broom or brush making; paint pads and rollers; squeegees (other than roller squeegees) | Inhabited environment | Inhabited Environment maintenance |
| 44121 | Mowers for lawns, parks or sportsgrounds                                                                                                                                                                                | Inhabited environment | Inhabited Environment maintenance |
| 44622 | Laundry-type washing machines, each of a dry linen capacity exceeding 10 kg; dry-cleaning machines; drying machines for textile fabrics or articles, each of a dry linen capacity exceeding 10 kg                       | Inhabited environment | Inhabited Environment maintenance |
| 44911 | Centrifugal clothes driers                                                                                                                                                                                              | Inhabited environment | Inhabited Environment maintenance |
| 38701 | Prefabricated buildings, of wood                                                                                                                                                                                        | Inhabited environment | Ambient structures                |
| 38702 | Prefabricated buildings, of metal                                                                                                                                                                                       | Inhabited environment | Ambient structures                |
| 38703 | Prefabricated buildings, of plastics                                                                                                                                                                                    | Inhabited environment | Ambient structures                |
| 38704 | Prefabricated buildings, of concrete                                                                                                                                                                                    | Inhabited environment | Ambient structures                |

| code  | CPC category                                                                                                                                          | Level 1                              | Level 2                         |
|-------|-------------------------------------------------------------------------------------------------------------------------------------------------------|--------------------------------------|---------------------------------|
| 49222 | Trailers and semi-trailers of the caravan type, for housing or camping                                                                                | Inhabited environment                | Ambient structures              |
| 53111 | One- and two-dwelling residential buildings                                                                                                           | Inhabited environment                | Ambient structures              |
| 53112 | Multi-dwelling residential buildings                                                                                                                  | Inhabited environment                | Ambient structures              |
| 53122 | Commercial buildings                                                                                                                                  | Inhabited environment                | Ambient structures              |
| 53253 | Sewage and water treatment plants                                                                                                                     | Inhabited environment                | Waste management                |
| 38410 | Snow-skis and other snow-ski equipment; ice-skates and roller-skates                                                                                  | Information, organization and neural | Active recreation               |
| 38420 | Water-skis, surf-boards, sailboards and other water-sport equipment                                                                                   | Information, organization and neural | Active recreation               |
| 38430 | Gymnasium or athletics articles and equipment                                                                                                         | Information, organization and neural | Active recreation               |
| 38440 | Other articles and equipment for sports or outdoor games                                                                                              | Information, organization and neural | Active recreation               |
| 53270 | Outdoor sport and recreation facilities                                                                                                               | Information, organization and neural | Active recreation               |
| 32210 | Educational textbooks, in print                                                                                                                       | Information, organization and neural | Deliberate Neural Restructuring |
| 32291 | Professional, technical and scholarly books, in print                                                                                                 | Information, organization and neural | Deliberate Neural Restructuring |
| 32620 | Trade advertising Materials, commercial catalogues and the like                                                                                       | Information, organization and neural | Deliberate Neural Restructuring |
| 38996 | Instruments, apparatus and models, designed for demonstrational purposes, unsuitable for other uses                                                   | Information, organization and neural | Deliberate Neural Restructuring |
| 38963 | Collections and collectors' pieces of zoological, botanical, mineralogical, anatomical, historical, ethnographic or numismatic interest; antiques     | Information, organization and neural | Deliberate Neural Restructuring |
| 47213 | Television cameras                                                                                                                                    | Information, organization and neural | Neural Stimulus                 |
| 47214 | Video camera recorders                                                                                                                                | Information, organization and neural | Neural Stimulus                 |
| 47215 | Digital cameras                                                                                                                                       | Information, organization and neural | Neural Stimulus                 |
| 47221 | Line telephone sets with cordless handsets                                                                                                            | Information, organization and neural | Neural Stimulus                 |
| 47311 | Radio broadcast receivers (except of a kind used in motor vehicles), whether or not combined with sound recording or reproducing apparatus or a clock | Information, organization and neural | Neural Stimulus                 |
| 47312 | Radio broadcast receivers not capable of operating without an external source of power, of a kind used in motor vehicles                              | Information, organization and neural | Neural Stimulus                 |
| 47313 | Television receivers, whether or not combined with radio-broadcast receivers or sound or video recording or reproducing apparatus                     | Information, organization and neural | Neural Stimulus                 |

| code  | CPC category                                                                                                                                                                  | Level 1                              | Level 2         |
|-------|-------------------------------------------------------------------------------------------------------------------------------------------------------------------------------|--------------------------------------|-----------------|
| 48322 | Photographic (including cinematographic) cameras                                                                                                                              | Information, organization and neural | Neural Stimulus |
| 48323 | Cinematographic projectors                                                                                                                                                    | Information, organization and neural | Neural Stimulus |
| 48329 | Other photographic equipment                                                                                                                                                  | Information, organization and neural | Neural Stimulus |
| 38581 | Video game consoles                                                                                                                                                           | Information, organization and neural | Neural Stimulus |
| 47330 | Microphones and stands therefor; loudspeakers; headphones, earphones and combined microphone/speaker sets; audio-frequency electric amplifiers; electric sound amplifier sets | Information, organization and neural | Neural Stimulus |
| 48341 | Photographic plates and film and instant print film, sensitized, unexposed                                                                                                    | Information, organization and neural | Neural Stimulus |
| 84311 | On-line books                                                                                                                                                                 | Information, organization and neural | Neural Stimulus |
| 84312 | On-line newspapers and periodicals                                                                                                                                            | Information, organization and neural | Neural Stimulus |
| 84313 | On-line directories and mailing lists                                                                                                                                         | Information, organization and neural | Neural Stimulus |
| 84321 | Musical audio downloads                                                                                                                                                       | Information, organization and neural | Neural Stimulus |
| 84322 | Streamed audio content                                                                                                                                                        | Information, organization and neural | Neural Stimulus |
| 84331 | Films and other video downloads                                                                                                                                               | Information, organization and neural | Neural Stimulus |
| 84332 | Streamed video content                                                                                                                                                        | Information, organization and neural | Neural Stimulus |
| 84391 | On-line games                                                                                                                                                                 | Information, organization and neural | Neural Stimulus |
| 84392 | On-line software                                                                                                                                                              | Information, organization and neural | Neural Stimulus |
| 84393 | On-line adult content                                                                                                                                                         | Information, organization and neural | Neural Stimulus |
| 84399 | Other on-line content n.e.c.                                                                                                                                                  | Information, organization and neural | Neural Stimulus |
| 32292 | Children's books, in print                                                                                                                                                    | Information, organization and neural | Neural Stimulus |
| 32299 | Other books n.e.c., in print                                                                                                                                                  | Information, organization and neural | Neural Stimulus |
| 32520 | Music, printed or in manuscript                                                                                                                                               | Information, organization and neural | Neural Stimulus |
| 32530 | Printed or illustrated postcards; printed cards bearing personal greetings or messages, with or without envelopes or trimmings                                                | Information, organization and neural | Neural Stimulus |
| 32540 | Printed pictures, designs and photographs                                                                                                                                     | Information, organization and neural | Neural Stimulus |

| code  | CPC category                                                                                                                                                                                                                          | Level 1                              | Level 2         |
|-------|---------------------------------------------------------------------------------------------------------------------------------------------------------------------------------------------------------------------------------------|--------------------------------------|-----------------|
| 32630 | Transfers (decalcomanias) and printed calendars                                                                                                                                                                                       | Information, organization and neural | Neural Stimulus |
| 32690 | Other printed matter                                                                                                                                                                                                                  | Information, organization and neural | Neural Stimulus |
| 38582 | Software cartridges for video game consoles                                                                                                                                                                                           | Information, organization and neural | Neural Stimulus |
| 38941 | Photographic plates, film, paper, paperboard and textiles, exposed but not developed                                                                                                                                                  | Information, organization and neural | Neural Stimulus |
| 38942 | Photographic plates and film, exposed and developed, other than cinematographic film                                                                                                                                                  | Information, organization and neural | Neural Stimulus |
| 38950 | Motion picture film, exposed and developed, whether or not incorporating sound track or consisting only of sound track                                                                                                                | Information, organization and neural | Neural Stimulus |
| 38310 | Pianos and other keyboard stringed musical instruments                                                                                                                                                                                | Information, organization and neural | Neural Stimulus |
| 38320 | Other string musical instruments                                                                                                                                                                                                      | Information, organization and neural | Neural Stimulus |
| 38330 | Wind musical instruments (including pipe organs, accordians and brass-wind instruments)                                                                                                                                               | Information, organization and neural | Neural Stimulus |
| 38340 | Musical instruments, the sound of which is produced, or must be amplified, electrically                                                                                                                                               | Information, organization and neural | Neural Stimulus |
| 38350 | Other musical instruments (including percussion instruments, musical boxes and fairground organs); decoy calls; whistles, call horns and other mouth-blown sound signalling instruments                                               | Information, organization and neural | Neural Stimulus |
| 38360 | Parts and accessories of musical instruments; metronomes, tuning forks and pitch pipes                                                                                                                                                | Information, organization and neural | Neural Stimulus |
| 38510 | Dolls' carriages; wheeled toys designed to be ridden by children                                                                                                                                                                      | Information, organization and neural | Neural Stimulus |
| 38520 | Dolls representing human beings; toys representing animals or non-human creatures                                                                                                                                                     | Information, organization and neural | Neural Stimulus |
| 38540 | Toy electric trains and tracks, signals and other accessories therefor; reduced-size ("scale") model assembly kits and other construction sets and constructional toys                                                                | Information, organization and neural | Neural Stimulus |
| 38550 | Puzzles                                                                                                                                                                                                                               | Information, organization and neural | Neural Stimulus |
| 38560 | Other toys (including toy musical instruments)                                                                                                                                                                                        | Information, organization and neural | Neural Stimulus |
| 38570 | Playing cards                                                                                                                                                                                                                         | Information, organization and neural | Neural Stimulus |
| 38590 | Other articles for funfair, table or parlour games (including articles for billiards, pintables, special tables for casino games and automatic bowling alley equipment), except video games of a kind used with a television receiver | Information, organization and neural | Neural Stimulus |
| 38600 | Roundabouts, swings, shooting galleries and other fairground amusements                                                                                                                                                               | Information, organization and neural | Neural Stimulus |
| 38991 | Festive, carnival or other entertainment articles, including conjuring tricks and novelty jokes                                                                                                                                       | Information, organization and neural | Neural Stimulus |

| code  | CPC category                                                                                                                                                                                                 | Level 1                              | Level 2                                   |
|-------|--------------------------------------------------------------------------------------------------------------------------------------------------------------------------------------------------------------|--------------------------------------|-------------------------------------------|
| 47822 | Computer game software, packaged                                                                                                                                                                             | Information, organization and neural | Neural Stimulus                           |
| 44710 | Tanks and other armoured fighting vehicles, motorized, and parts thereof                                                                                                                                     | Information, organization and neural | Enforcement                               |
| 44720 | Military weapons, other than revolvers, pistols and swords and the like                                                                                                                                      | Information, organization and neural | Enforcement                               |
| 44730 | Revolvers, pistols, other firearms and similar devices; other arms                                                                                                                                           | Information, organization and neural | Enforcement                               |
| 44750 | Swords, cutlasses, bayonets, lances and similar arms and parts thereof and scabbards and sheaths therefor                                                                                                    | Information, organization and neural | Enforcement                               |
| 42992 | Padlocks and locks, of base metal; clasps and frames with clasps, incorporating locks, of base metal; keys and parts thereof, of base metal; base metal fittings for furniture, doors, saddlery and the like | Information, organization and neural | Exchange                                  |
| 45141 | Accounting machines, cash registers, postage-franking machines, ticket-issuing machines and similar machines, incorporating a calculating device (except point-of-sale terminals, ATMs and similar machines) | Information, organization and neural | Exchange                                  |
| 32610 | Unused postage, revenue or similar stamps; stamp-impressed paper; cheque forms; banknotes, stock, share or bond certificates and similar documents of title                                                  | Information, organization and neural | Exchange                                  |
| 38250 | Coin                                                                                                                                                                                                         | Information, organization and neural | Exchange                                  |
| 38962 | Postage or revenue stamps, stamp-postmarks, first-day covers, postal stationery (stamped paper) and the like                                                                                                 | Information, organization and neural | Exchange                                  |
| 43922 | Weighing machinery (excluding balances of a sensitivity of 5 cg or better)                                                                                                                                   | Information, organization and neural | Exchange                                  |
| 47910 | Cards with a magnetic stripe                                                                                                                                                                                 | Information, organization and neural | Exchange                                  |
| 47920 | "Smart cards"                                                                                                                                                                                                | Information, organization and neural | Exchange                                  |
| 45142 | Point-of-sale terminals, ATMs and similar machines                                                                                                                                                           | Information, organization and neural | Exchange                                  |
| 48231 | Balances with a sensitivity of 5 cg or better                                                                                                                                                                | Information, organization and neural | Exchange                                  |
| 42993 | Armoured or reinforced safes, strong-boxes and doors and safe deposit lockers for strong-rooms, cash or deed boxes and the like, of base metal                                                               | Information, organization and neural | Exchange                                  |
| 43934 | Automatic goods vending machines                                                                                                                                                                             | Information, organization and neural | Exchange                                  |
| 48263 | Gas, liquid or electricity supply or production meters                                                                                                                                                       | Information, organization and neural | Exchange                                  |
| 53252 | Local cables and related works                                                                                                                                                                               | Information, organization and neural | Information communications infrastructure |

| code         | CPC category                                                                                                                                                                                                 | Level 1                              | Level 2                                   |
|--------------|--------------------------------------------------------------------------------------------------------------------------------------------------------------------------------------------------------------|--------------------------------------|-------------------------------------------|
| <b>48244</b> | Instruments and apparatus (except cathode-ray oscilloscopes and oscillographs) for telecommunications                                                                                                        | Information, organization and neural | Information communications infrastructure |
| <b>32420</b> | Business, professional or academic newspapers and periodicals, other than daily, in print                                                                                                                    | Information, organization and neural | Information storage, processing & display |
| <b>47222</b> | Telephones for cellular networks or for other wireless networks                                                                                                                                              | Information, organization and neural | Information storage, processing & display |
| <b>47692</b> | Text-based disks, tapes or other physical media                                                                                                                                                              | Information, organization and neural | Information storage, processing & display |
| <b>48410</b> | Watches                                                                                                                                                                                                      | Information, organization and neural | Information storage, processing & display |
| <b>48420</b> | Clocks                                                                                                                                                                                                       | Information, organization and neural | Information storage, processing & display |
| <b>48430</b> | Time of day recording apparatus, apparatus for measuring, recording or otherwise indicating intervals of time, and time switches, with clock or watch movement or with synchronous motor                     | Information, organization and neural | Information storage, processing & display |
| <b>45130</b> | Electronic calculators and pocket-size data recording, reproducing and displaying machines with calculating functions                                                                                        | Information, organization and neural | Information storage, processing & display |
| <b>45220</b> | Portable automatic data processing machines weighing not more than 10 kg, such as laptops, notebooks and sub-notebooks                                                                                       | Information, organization and neural | Information storage, processing & display |
| <b>45230</b> | Automatic data processing machines, comprising in the same housing at least a central processing unit and an input and output unit, whether or not combined                                                  | Information, organization and neural | Information storage, processing & display |
| <b>45240</b> | Automatic data processing machines presented in the form of systems                                                                                                                                          | Information, organization and neural | Information storage, processing & display |
| <b>45250</b> | Other automatic data processing machines whether or not containing in the same housing one or two of the following types of units: storage units, input units, output units                                  | Information, organization and neural | Information storage, processing & display |
| <b>47223</b> | Other telephone sets and apparatus for transmission or reception of voice, images or other data, including apparatus for communication in a wired or wireless network (such as a local or wide area network) | Information, organization and neural | Information storage, processing & display |
| <b>47811</b> | Operating systems, packaged                                                                                                                                                                                  | Information, organization and neural | Information storage, processing & display |
| <b>47812</b> | Network software, packaged                                                                                                                                                                                   | Information, organization and neural | Information storage, processing & display |
| <b>47813</b> | Database management software, packaged                                                                                                                                                                       | Information, organization and neural | Information storage, processing & display |
| <b>47814</b> | Development tools and programming languages software, packaged                                                                                                                                               | Information, organization and neural | Information storage, processing & display |
| <b>47821</b> | General business productivity and home use applications, packaged                                                                                                                                            | Information, organization and neural | Information storage, processing & display |
| <b>47829</b> | Other application software, packaged                                                                                                                                                                         | Information, organization and neural | Information storage, processing & display |
| <b>84341</b> | System software downloads                                                                                                                                                                                    | Information, organization and neural | Information storage, processing & display |

| code  | CPC category                                                                                                                                                                                                                                                                                                                              | Level 1                              | Level 2                                   |
|-------|-------------------------------------------------------------------------------------------------------------------------------------------------------------------------------------------------------------------------------------------------------------------------------------------------------------------------------------------|--------------------------------------|-------------------------------------------|
| 84342 | Application software downloads                                                                                                                                                                                                                                                                                                            | Information, organization and neural | Information storage, processing & display |
| 84394 | Web search portal content                                                                                                                                                                                                                                                                                                                 | Information, organization and neural | Information storage, processing & display |
| 45150 | Office type sheet-fed offset printing machinery                                                                                                                                                                                                                                                                                           | Information, organization and neural | Information storage, processing & display |
| 32220 | General reference books, in print                                                                                                                                                                                                                                                                                                         | Information, organization and neural | Information storage, processing & display |
| 32230 | Directories, in print                                                                                                                                                                                                                                                                                                                     | Information, organization and neural | Information storage, processing & display |
| 32300 | Newspapers and periodicals, daily, in print                                                                                                                                                                                                                                                                                               | Information, organization and neural | Information storage, processing & display |
| 32410 | General interest newspapers and periodicals, other than daily, in print                                                                                                                                                                                                                                                                   | Information, organization and neural | Information storage, processing & display |
| 32490 | Other newspapers and periodicals, other than daily, in print                                                                                                                                                                                                                                                                              | Information, organization and neural | Information storage, processing & display |
| 32511 | Maps and hydrographic or similar charts (including wall maps, topographical plans and maps for globes), printed, other than in book-form                                                                                                                                                                                                  | Information, organization and neural | Information storage, processing & display |
| 32512 | Globes                                                                                                                                                                                                                                                                                                                                    | Information, organization and neural | Information storage, processing & display |
| 32700 | Registers, account books, notebooks, letter pads, diaries and similar articles, blotting-pads, binders, file covers, forms and other articles of stationery, of paper or paperboard                                                                                                                                                       | Information, organization and neural | Information storage, processing & display |
| 38911 | Pens, duplicating stylos, pencils, pen-holders, pencil-holders and similar holders, and parts thereof; crayons, pencil leads, pastels, drawing charcoals and chalks                                                                                                                                                                       | Information, organization and neural | Information storage, processing & display |
| 38912 | Date, sealing or numbering stamps, and the like, designed for operating in the hand; hand-operated composing sticks and hand printing sets incorporating such sticks; typewriter or similar ribbons, prepared for giving impressions; ink-pads                                                                                            | Information, organization and neural | Information storage, processing & display |
| 32191 | Carbon paper, self-copy paper and other copying or transfer papers, not in bulk sizes; duplicator stencils and offset plates, of paper                                                                                                                                                                                                    | Information, organization and neural | Information storage, processing & display |
| 48232 | Drafting tables and machines, and other drawing, marking-out or mathematical calculating instruments                                                                                                                                                                                                                                      | Information, organization and neural | Information storage, processing & display |
| 48160 | Mechano-therapy appliances; massage apparatus; psychological aptitude-testing apparatus; ozone therapy, oxygen therapy, aerosol therapy, artificial respiration or other therapeutic respiration apparatus; other breathing appliances and gas masks (excluding protective masks having neither mechanical parts nor replaceable filters) | Somatic maintenance                  | Health care                               |
| 48171 | Orthopaedic appliances; splints and other fracture appliances; artificial parts of the body                                                                                                                                                                                                                                               | Somatic maintenance                  | Health care                               |
| 48172 | Hearing aids and other appliances which are worn or carried, or implanted in the body, to compensate for a defect or disability                                                                                                                                                                                                           | Somatic maintenance                  | Health care                               |
| 35270 | Other pharmaceutical products                                                                                                                                                                                                                                                                                                             | Somatic maintenance                  | Health care                               |

| code         | CPC category                                                                                                                                                                                                                     | Level 1             | Level 2            |
|--------------|----------------------------------------------------------------------------------------------------------------------------------------------------------------------------------------------------------------------------------|---------------------|--------------------|
| <b>48180</b> | Medical, surgical, dental or veterinary furniture; barbers' chairs and similar chairs, having rotating as well as both reclining and elevating movements                                                                         | Somatic maintenance | Health care        |
| <b>37195</b> | Laboratory, hygienic or pharmaceutical glassware; ampoules of glass                                                                                                                                                              | Somatic maintenance | Health care        |
| <b>48140</b> | Medical, surgical or laboratory sterilizers                                                                                                                                                                                      | Somatic maintenance | Health care        |
| <b>48241</b> | Instruments and apparatus for measuring or detecting ionizing radiations                                                                                                                                                         | Somatic maintenance | Health care        |
| <b>48110</b> | Apparatus based on the use of X-rays or of alpha, beta or gamma radiations                                                                                                                                                       | Somatic maintenance | Health care        |
| <b>48121</b> | Electro-diagnostic apparatus, used in medical, surgical, dental or veterinary sciences                                                                                                                                           | Somatic maintenance | Health care        |
| <b>48122</b> | Ultra-violet or infra-red ray apparatus, used in medical, surgical, dental or veterinary sciences                                                                                                                                | Somatic maintenance | Health care        |
| <b>48130</b> | Other instruments and appliances (except syringes, needles and the like), used in dental sciences                                                                                                                                | Somatic maintenance | Health care        |
| <b>48150</b> | Other instruments and appliances used in medical, surgical or veterinary sciences (including syringes, needles, catheters, cannulae, ophthalmic instruments and appliances n.e.c. and electro-medical apparatus n.e.c.)          | Somatic maintenance | Health care        |
| <b>32193</b> | Toilet paper, handkerchiefs, towels, serviettes, napkins for babies, tampons, and similar household, sanitary or hospital articles, and articles of apparel, of paper pulp, paper, cellulose wadding or webs of cellulose fibres | Somatic maintenance | Hygiene & grooming |
| <b>32196</b> | Sanitary towels (pads) and tampons, napkins and napkin liners for babies and similar articles, of any Materials                                                                                                                  | Somatic maintenance | Hygiene & grooming |
| <b>36930</b> | Baths, wash-basins, lavatory pans and covers, flushing cisterns and similar sanitary ware, of plastics                                                                                                                           | Somatic maintenance | Hygiene & grooming |
| <b>42911</b> | Sinks, wash-basins, baths and other sanitary ware and parts thereof, of iron, steel, copper or aluminium                                                                                                                         | Somatic maintenance | Hygiene & grooming |
| <b>42914</b> | Razors and razor blades (including razor blade blanks in strips)                                                                                                                                                                 | Somatic maintenance | Hygiene & grooming |

Table S3. Technosphere mass estimates by MEUTEC category, corresponding with Figure 3. See appendix for details. All numbers (other than the uncertainty range factor) are in Mt ( $10^{12}$  g).

| Technosphere categories                        |                                                         | Data sources                                |        |        |     |        |        | Estimates |                |            |        |              |    |
|------------------------------------------------|---------------------------------------------------------|---------------------------------------------|--------|--------|-----|--------|--------|-----------|----------------|------------|--------|--------------|----|
|                                                |                                                         | MISO2                                       |        | Wie24  | Hab | Mat    | Other  | Non-fixed | Non-build-ings | Build-ings | Total  | Uncer-tainty |    |
|                                                |                                                         | non-fixed                                   | total  |        |     |        |        |           |                |            |        | Range factor |    |
| Creation & maintenance of technosphere         | Material extraction                                     | 420                                         | 420    |        |     |        |        | 420       | 420            | 6350       | 6770   | 5            |    |
|                                                | Material processing                                     | 839                                         | 839    |        |     |        |        | 839       | 839            | 12700      | 13539  | 5            |    |
|                                                | Creation & maintenance of artifacts                     | 818                                         | 818    |        |     | 3867   |        | 2342      | 2342           | 38100      | 40442  | 3            |    |
|                                                | Construction & maintenance buildings and infrastructure | 1537                                        | 1537   |        |     | 1960   |        | 1749      | 1749           | 6350       | 8099   | 3            |    |
| Energy Provisioning                            | Energy extraction and converters                        | 705                                         | 7979   |        |     |        | 8440   | 705       | 8210           | 3810       | 9145   | 4            |    |
|                                                | Electricity transmission                                | 0                                           | 2425   |        |     |        | 1676   | 0         | 2050           | 1270       | 3320   | 2            |    |
| Transportation                                 | Surfaces                                                | 0                                           | 438930 | 314000 |     | 376908 |        | 0         | 376613         | 0          | 376613 | 2            |    |
|                                                | Storage & logistics                                     | 1077                                        | 25325  |        |     | 948    |        | 1077      | 25325          | 31750      | 57075  | 3            |    |
|                                                | Pipelines                                               | 0                                           | 2425   |        |     | 3000   |        | 0         | 2712           | 0          | 2712   | 3            |    |
|                                                | Terrestrial Vehicles                                    | 3104                                        | 3104   |        |     | 4398   |        | 3104      | 4398           | 0          | 4398   | 2            |    |
|                                                | Aquatic vessels                                         | 592                                         | 592    |        |     | 626    |        | 609       | 609            | 0          | 609    | 2            |    |
|                                                | Aircraft                                                | 2                                           | 2      |        |     | 2      |        | 2         | 2              | 0          | 2      | 3            |    |
|                                                | Food provisioning                                       | Food growth & collection                    | 0      | 0      |     |        | 625    |           | 625            | 625        | 10160  | 10785        | 5  |
| Food provisioning                              | Food processing & preservation                          | 398                                         | 398    |        |     |        |        | 398       | 398            | 6350       | 6748   | 5            |    |
|                                                | Food preparation                                        | 264                                         | 264    |        |     | 236    |        | 250       | 250            | 9900       | 10150  | 3            |    |
|                                                | Somatic maintenance                                     | Hygiene and grooming                        | 0      | 0      |     |        | 16     |           | 16             | 16         | 3300   | 3316         | 10 |
| Somatic maintenance                            | Health care                                             | 157                                         | 157    |        |     | 73     |        | 157       | 115            | 3300       | 3415   | 5            |    |
|                                                | Inhabited environment                                   | Inhabited environment maintenance           | 399    | 399    |     |        | 473    |           | 436            | 436        | 0      | 436          | 3  |
| Inhabited environment                          | Waste management                                        | 0                                           | 0      |        |     |        |        | 0         | 0              | 2540       | 2540   | 3            |    |
|                                                | Information, organization & neural interaction          | Information storage, processing and display | 1302   | 1302   |     |        | 47     |           | 1302           | 1302       | 2540   | 3842         | 5  |
| Information communications infrastructure      |                                                         | 0                                           | 4850   |        |     |        |        | 0         | 4850           | 2540       | 7390   | 5            |    |
| Exchange                                       |                                                         | 0                                           | 0      |        |     | 16     |        | 16        | 16             | 3300       | 3316   | 10           |    |
| Enforcement                                    |                                                         | 0                                           | 7274   |        |     | 21     |        | 64        | 64             | 5840       | 5904   | 5            |    |
| Deliberate neural restructuring                |                                                         | 150                                         | 150    |        |     |        |        | 150       | 150            | 6600       | 6750   | 5            |    |
| Information, organization & neural interaction | Neural stimulus                                         | 625                                         | 625    |        |     |        |        | 625       | 625            | 1650       | 2275   | 5            |    |
|                                                | Active recreation                                       | 26                                          | 4876   |        |     |        |        | 26        | 4876           | 1650       | 6526   | 5            |    |
|                                                | Ambient context                                         | Ambient structures                          | 0      | 289813 |     | 512000 | 246072 | 15000     | 0              |            | 364295 | 364295       | 2  |
|                                                |                                                         | Furnishings                                 | 1317   | 1317   |     |        | 436    |           | 1347           | 1347       | 0      | 1347         | 3  |
|                                                |                                                         | Apparel                                     | 73     | 73     |     |        | 389    |           | 389            | 389        | 0      | 389          | 5  |
| Hydraulic control                              |                                                         | 0                                           | 63044  |        |     |        |        | 0         | 63044          | 0          | 63044  | 5            |    |

Table S4. Concordance matrix for MISO2 to MEUTEC, excluding buildings. All numbers are fractions, other than sums which are in Mt.

| MISO2                |                                            |                                                                                                                                                                                                                                                                                                                                                                                                                                                           |        |
|----------------------|--------------------------------------------|-----------------------------------------------------------------------------------------------------------------------------------------------------------------------------------------------------------------------------------------------------------------------------------------------------------------------------------------------------------------------------------------------------------------------------------------------------------|--------|
| End-use groups       | End-use sectors                            | Description and examples                                                                                                                                                                                                                                                                                                                                                                                                                                  |        |
|                      |                                            |                                                                                                                                                                                                                                                                                                                                                                                                                                                           | SUMS   |
| Infrastructure       | Roads                                      | Road surfaces of highways (except elevated highways), streets, roads                                                                                                                                                                                                                                                                                                                                                                                      | 312843 |
|                      | Civil engineering except roads             | Railways, airfield runways, bridges and elevated highways, tunnels, subways, water supply pipes, harbors, dams, flood control waterworks, power plant construction, outdoor sport and recreation facilities, local and long distance pipelines, local and long distance communication and power lines and so forth...                                                                                                                                     | 242475 |
| Stationary Machinery | Machinery and equipment                    | Turbines, washing machinery; air conditioning; cranes; shovels, excavators and other construction machine; refrigerators, freezers; tools for pressing, stamping or punching; vacuum pumps, compressors, fans, blowers; rock drilling or earth boring tools; razors; sawing or cutting machines, bridge cranes; bulldozers and angledozers; milling machines; heat exchange units, printing machinery; diesel engines                                     | 4195   |
|                      | Computers and precision instruments        | Personal computers; monitors; optical devices, appliances and instruments; wrist watches; TV and radio; loudspeakers; headphones; other sound reproducing apparatus; television cameras; automatic data processing machines & units; photocopying apparatus; video cameras and recorders; instruments and apparatus for physical or chemical analysis; electronic calculators; lasers; accounting machines; burglar or fire alarms and similar apparatus; | 419    |
|                      | Electrical equipment                       | Electric motors, generators and transformers (AC/DC); lighting or visual signaling equipment; ovens; cookers; static/electronic converters; domestic vacuum cleaners; electric heaters; electric fences; domestic food grinders and mixers; fruit or vegetable juice extractor; Handheld drills; electrothermic coffee or tea maker; electric saws; electric shavers;                                                                                     | 755    |
| Transport Machinery  | Motor vehicles trailers and semi-trailers  | Automobiles including parts and accessories thereof; trucks including parts and accessories thereof; buses; tractors; snowmobiles; mobile cranes; fire fighting vehicles;                                                                                                                                                                                                                                                                                 | 2786   |
|                      | Other transport equipment                  | Cargo containers; cargo vessels; aircraft; tankers; motorcycles; bicycles and other cycles; trailers; rail locomotive; tanks; cruise ships; baby carriage and parts thereof; railway coaches and cars; helicopters; balloons; motorboats; wheelchairs; rowing boats; Fishing vessels and factory ships                                                                                                                                                    | 1987   |
| Short lived products | Furniture and other manufactured goods nec | Articles of bedding/furnishing; paintings and drawings; original sculptures and statuary; mattresses; instruments and appliances used in medical or veterinary sciences; furniture for domestic use or office; music instruments of all kinds; toys; sport equipment; umbrellas;                                                                                                                                                                          | 1568   |
|                      | Printed matter and recorded media          | Plans, maps & drawings; books, brochures, leaflets and similar printed matter; newspapers, journals and periodicals; advertising material; Pictures, designs and photographs; dictionaries and encyclopedias, and serial instalments thereof; music, printed or in manuscript                                                                                                                                                                             | 1501   |
|                      | Food packaging                             | Packaging materials like cans, pouches and bags, bottles, jars, cardboard boxes, shrink wrap, cartons, pallets, stretch wrap                                                                                                                                                                                                                                                                                                                              | 471    |
|                      | Products nec                               | Textiles, medicaments, cigarettes, beauty and makeup products, sunscreen or suntan products; photo plates and films, printing ink, soap, glues                                                                                                                                                                                                                                                                                                            | 122    |

| MISO2                |                                            |              |            |           |              |                                |                          |                |                     |           |                      |          |                 |
|----------------------|--------------------------------------------|--------------|------------|-----------|--------------|--------------------------------|--------------------------|----------------|---------------------|-----------|----------------------|----------|-----------------|
| End-use groups       | End-use sectors                            | Technosphere |            |           |              | Energy                         |                          | Transportation |                     |           |                      |          |                 |
|                      |                                            | Extraction   | Processing | Artifacts | Construction | Energy carriers and converters | Electricity transmission | Surfaces       | Storage & logistics | Pipelines | Terrestrial vehicles | Aircraft | Aquatic vessels |
|                      |                                            | 420          | 839        | 818       | 1537         | 7979                           | 2425                     | 438930         | 25325               | 2425      | 3104                 | 2        | 592             |
| Infrastructure       | Roads                                      |              |            |           |              |                                |                          | 1              |                     |           |                      |          |                 |
|                      | Civil engineering except roads             |              |            |           |              | 0.03                           | 0.01                     | 0.52           | 0.1                 | 0.01      |                      |          |                 |
| Stationary Machinery | Machinery and equipment                    | 0.1          | 0.2        | 0.15      | 0.3          | 0.15                           |                          |                |                     |           |                      |          |                 |
|                      | Computers and precision instruments        |              |            |           |              |                                |                          |                |                     |           |                      |          |                 |
|                      | Electrical equipment                       |              |            | 0.25      |              | 0.1                            |                          |                |                     |           |                      |          |                 |
| Transport Machinery  | Motor vehicles trailers and semi-trailers  |              |            |           | 0.1          |                                |                          |                |                     |           | 0.9                  |          |                 |
|                      | Other transport equipment                  |              |            |           |              |                                |                          |                | 0.4                 |           | 0.3                  | 0.001    | 0.298           |
| Short lived products | Furniture and other manufactured goods nec |              |            |           |              |                                |                          |                |                     |           |                      |          |                 |
|                      | Printed matter and recorded media          |              |            |           |              |                                |                          |                |                     |           |                      |          |                 |
|                      | Food packaging                             |              |            |           |              |                                |                          |                | 0.6                 |           |                      |          |                 |
|                      | Products nec                               |              |            |           |              |                                |                          |                |                     |           |                      |          |                 |

| MISO2                           |                                                     |                                    |                 |                  |                |                                      |               |       |                                                 |                    |                           |
|---------------------------------|-----------------------------------------------------|------------------------------------|-----------------|------------------|----------------|--------------------------------------|---------------|-------|-------------------------------------------------|--------------------|---------------------------|
| End-use groups                  | End-use sectors                                     | Inhab-<br>ited<br>environ-<br>ment | Food            |                  | Somatic        | Information organization neural      |               |       |                                                 |                    |                           |
|                                 |                                                     | Inhab<br>Env                       | Proces-<br>sing | Prepara-<br>tion | Health<br>care | InfoStora<br>ge &<br>Proces-<br>sing | Info<br>Comms | Force | Deliber-<br>ate<br>neural<br>restruct-<br>uring | Neural<br>stimulus | Active<br>recrea-<br>tion |
|                                 |                                                     | 399                                | 398             | 264              | 157            | 1302                                 | 4850          | 7274  | 150                                             | 625                | 4876                      |
| <b>Infrastructure</b>           | Roads                                               |                                    |                 |                  |                |                                      |               |       |                                                 |                    |                           |
|                                 | Civil engineering<br>except roads                   |                                    |                 |                  |                |                                      | 0.02          | 0.03  |                                                 |                    | 0.02                      |
| <b>Stationary<br/>Machinery</b> | Machinery and<br>equipment                          | 0.05                               | 0.05            |                  |                |                                      |               |       |                                                 |                    |                           |
|                                 | Computers and<br>precision<br>instruments           |                                    |                 |                  |                | 0.6                                  |               |       |                                                 | 0.4                |                           |
|                                 | Electrical<br>equipment                             | 0.25                               |                 | 0.35             |                |                                      |               |       |                                                 |                    |                           |
| <b>Transport<br/>Machinery</b>  | Motor vehicles<br>trailers and semi-<br>trailers    |                                    |                 |                  |                |                                      |               |       |                                                 |                    |                           |
|                                 | Other transport<br>equipment                        |                                    |                 |                  |                |                                      |               |       |                                                 |                    | 0.001                     |
| <b>Short lived<br/>products</b> | Furniture and<br>other<br>manufactured<br>goods nec |                                    |                 |                  | 0.1            |                                      |               |       |                                                 | 0.1                |                           |
|                                 | Printed matter<br>and recorded<br>media             |                                    |                 |                  |                | 0.7                                  |               |       | 0.1                                             | 0.2                |                           |
|                                 | Food packaging                                      |                                    | 0.4             |                  |                |                                      |               |       |                                                 |                    |                           |
|                                 | Products nec                                        |                                    |                 |                  |                |                                      |               |       |                                                 |                    | 0.2                       |

|                             |                                            |                |         |           |
|-----------------------------|--------------------------------------------|----------------|---------|-----------|
| <b>MISO2</b>                |                                            |                |         |           |
| <b>End-use groups</b>       | <b>End-use sectors</b>                     | <b>Ambient</b> |         |           |
|                             |                                            | Furnishings    | Apparel | Hydraulic |
|                             |                                            | 1317           | 73      | 63044     |
| <b>Infrastructure</b>       | Roads                                      |                |         |           |
|                             | Civil engineering except roads             |                |         | 0.26      |
| <b>Stationary Machinery</b> | Machinery and equipment                    |                |         |           |
|                             | Computers and precision instruments        |                |         |           |
|                             | Electrical equipment                       | 0.05           |         |           |
| <b>Transport Machinery</b>  | Motor vehicles trailers and semi-trailers  |                |         |           |
|                             | Other transport equipment                  |                |         |           |
| <b>Short lived products</b> | Furniture and other manufactured goods nec | 0.8            |         |           |
|                             | Printed matter and recorded media          |                |         |           |
|                             | Food packaging                             |                |         |           |
|                             | Products nec                               | 0.2            | 0.6     |           |
